# Supplementary material for: Electrophysical Properties of the Three-Component Multiferroic Ceramic Composites
Source: MDPI journal article supplement (doi:10.3390/ma17010049), 2023-12-22
Supplement: s1 [file s1]

## Supplementary materials

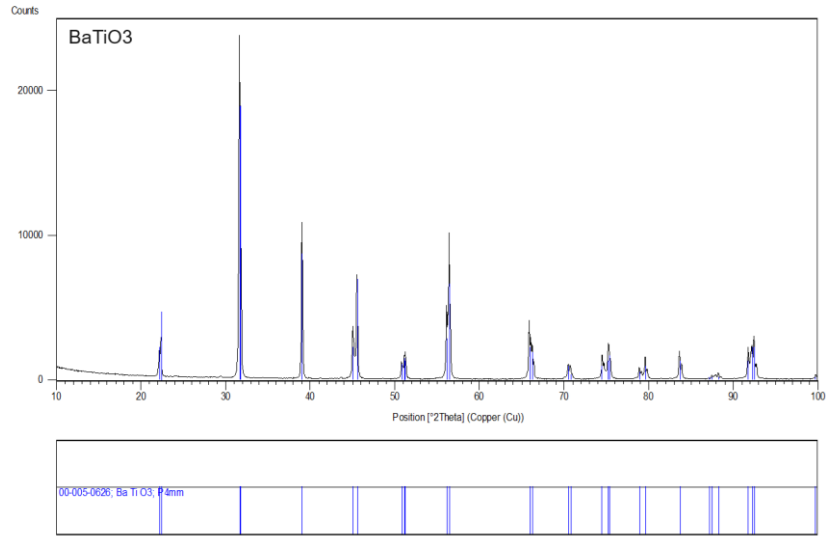

**Figure S1.** X-ray diffraction patterns for BaTiO<sub>3</sub> material.

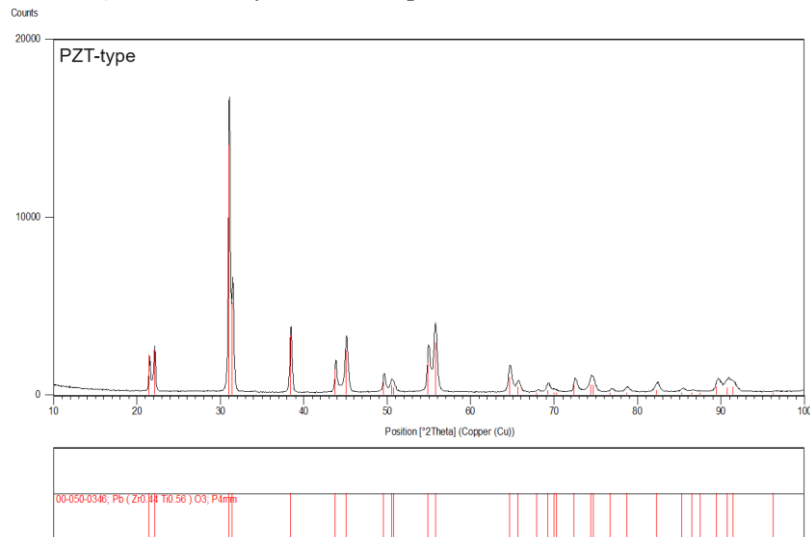

**Figure S2.** X-ray diffraction patterns for Pb<sub>0.94</sub>Sr<sub>0.06</sub>(Zr<sub>0.46</sub>Ti<sub>0.54</sub>)<sub>0.99</sub>Cr<sub>0.01</sub>O<sub>3</sub> material.

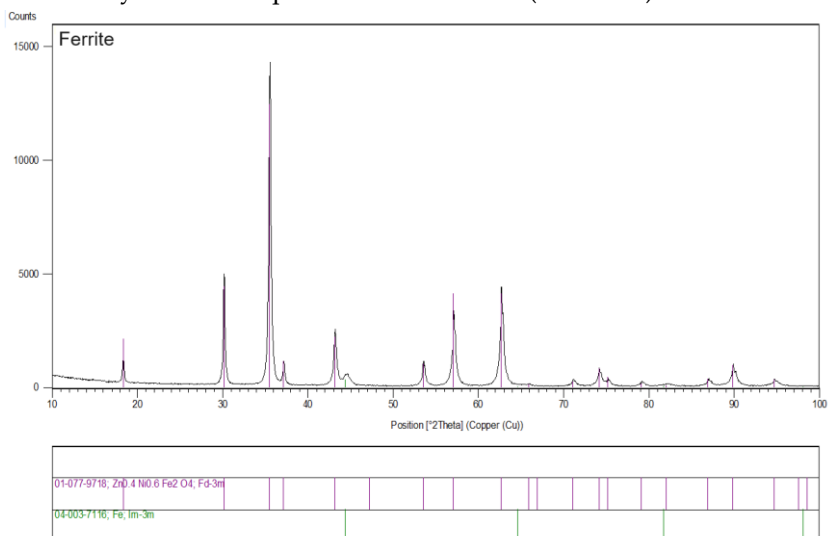

**Figure S3.** X-ray diffraction patterns for Ni<sub>0.64</sub>Zn<sub>0.36</sub>Fe<sub>2</sub>O<sub>4</sub> ferrite material.
